# Supplementary material for: Shadow of the law in cases of avoidable harm
Source: HighWire-hosted journal article supplement (doi:10.1136/bmj.i6268), 2016-11-24
Supplement: bmj.i6268.pdf [file bmj.i6268.pdf]

述评

## 可避免的伤害案件及其法律阴影

法律干预患者安全可能具有随意性和矛盾性

### The shadow of the law in cases of avoidable harm

The law's intervention in patient safety can be haphazard and inconsistent

来源:BMJ 2016;355:i6268 doi:10.1136/bmj. i6268

在 Bob Wachter 的患者安全博客中,头条是关于俄亥俄州的药剂师 Eric Cropp, 正式宣布“他因为医疗过错入狱”<sup>1</sup>。当 Cropp 的专业同行们在监狱探望室看到他穿着橙色连身裤时,他们知道这种情况也可能发生在自己身上。一位药店技术人员将化疗药物错误地与 23% 生理盐水混合,而非 0.9% 生理盐水。一个孩子因此死亡。那天工作繁忙,人手不足,且电脑因故障而不能正常工作,Cropp 监管核对时未能发现错误。他在 2009 年被判过失杀人罪。

英国诺丁汉的一名实习医生,2003 年因使用错误途径给予长春新碱而导致一位癌症患者死亡而被判入狱。调查人员确认了大约 40 个系统性故障<sup>2</sup>,然而,在法庭上,强调“个人责任”获得了支持。以前在英国发生过类似的情况,但是其他医生只是在私下被劝告。

自从有记录可寻开始,从 2005 年回顾被控过失杀人罪的英国医生有 85 人,1990 年至 2005 年期间有 38 人<sup>3</sup>;在 2006 年至 2015 年期间有 15 人<sup>4</sup>。

其中之一是英国国家健康体系(NHS)的外科医生 David Sellu。因一家私立医院的患者被判过失杀人罪,两年半刑期。在假释期间,Sellu 上周得知,上诉法院已经撤销了对他的判决<sup>5</sup>,由于下级法院法律程序方面的原因。

在上诉法院判决的事件年表上<sup>6</sup>,大多数患者安全故事具有不可避免的特点,并令人心寒。涉及一个复杂系统和不良

临床决策人为因素的混合体。因此,个人承担责任是有问题的。这些问题可以通过当地临床管理程序或严格的医疗规范审查而得到妥善处理。虽然案件很糟糕,但几乎没有医生会认为其达到了诉讼的门槛。特别是过去的不良医疗行为,并没有一个明确的处理模式。

#### 免责

一名医生或其他医疗保健专业人员在该种情况下是否应该被指控过失杀人罪?如果无粗心大意的行为或故意的不当行为的迹象,那么把失败当作一种犯罪就会产生一种消极的和惩罚性的气氛,这样的气氛会使自我保护的本能超过可能拯救生命的报告动机。在医疗保健和其他高风险行业安全方面的良好实践一贯强调,为了要有效保护未来患者的安全,免除责备和惩罚的方法是必要的<sup>7</sup>。可以理解的是,许多遭受严重事故的患者和家属会感到难以接受。

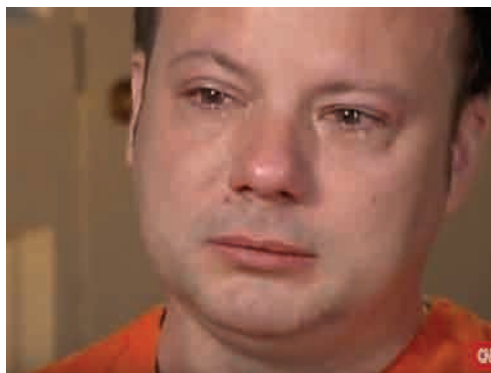

图1 Eric Cropp 因错配药物致一儿童死亡而被判刑

Liam J Donaldson  
professor of public  
health

Faculty of  
Epidemiology and  
Public Health,  
London School of  
Hygiene and Tropical  
Medicine, London  
WC1E 7HT, UK

Correspondence to:  
liam.donaldson@  
lshtm.ac.uk

孙齐蕊 译  
关 健 校  
中国医学科学院  
北京协和医院

在患者安全事件中,最初生效的法律程序往往是存在问题的。我曾经问过一群高级警务官员,在类似的情况下,为什么有些医生被起诉,而另外一些医生没有被起诉。他们回答,这依赖于是否有人提起诉讼。如果有人起诉了,那么警察有义务成立一个调查小组。且这项调查工作可以持续多年。医疗机构和综合医疗委员会(GMC)不能继续参与,因为有污染证据的风险。受害者会因怀疑事实被掩盖而愤怒,有关工作人员承受着巨大的压力,所有的工作进展都瘫痪了。有时调查被停下来,然后便使用诸如“宽恕”的词语,尽管对安全的担忧持续存在。

### 抗辩

在法庭上,确立因果关系时采用抗辩的方法。重点是放在被告方。一开始,事件来龙去脉本身(系统的背景)几乎会被忽视。陪审团必须处理情绪,这种情绪可能把案件与他们自己的医疗照护经历联系起来。

像过去涉及医生的许多争议一样,Sellu 案件引出了重要的政策问题。例如:为什么这么多急性病恶化的患者不得不死亡?该患者因为诊疗决策耽误,没有升级,沟通不畅,而陷入了脓毒血症,意味着其无法获救。在英格兰,与患者安全有关的所有死亡病例中,有三分之一是由于病情恶化患者的管理不善造成的<sup>8</sup>。这种明显的系统性缺陷导致主要危害。在解决这个问题上,NHS 表现极其失败。此外,对于那些没有足够技能治疗急性病患者的私立医院,能做些什么?

对医疗照护领域可避免的伤害这一复杂和微

妙领域,法律的干预往往有随意性和矛盾,其观点和过程,使得创建一个医疗更安全并激励医疗照护专业人员带头的系统更加困难。

利益竞争(Competing interests): I have read and understood BMJ policy on declaration of interests and declare I was chief medical officer for England between 1998 and 2010 and led reforms to medical regulation. I am currently the World Health Organization's envoy for patient safety.

来源及同行评议(Provenance and peer review): Commissioned; not externally peer reviewed.

### 参考文献

- 1 Wachter R. Jail time for a medical error, redux: the case of Eric Cropp. *Wachter's World* 26 Nov 2009. <http://community.the-hospitalist.org/2009/11/26/jail-time-for-a-medical-errorredux-the-case-of-eric-cropp/>.
- 2 Toft B. External inquiry into the adverse incident that occurred at Queen's Medical Centre, Nottingham 4th January 2001. Department of Health, 2001. <http://www.gatasm.org/sites/default/files/Brian%20Toft%20report.pdf>.
- 3 Ferner RE, McDowell SE. Doctors charged with manslaughter in the course of medical practice, 1795-2005: a literature review. *J R Soc Med* 2006;99:309-14. doi:10.1258/jrsm.99.6.309 pmid:16738374.
- 4 White P. More doctors charged with manslaughter are being convicted, shows analysis. *BMJ* 2015;351:h4402. doi:10.1136/bmj.h4402 pmid:26358705.
- 5 Dyer C. Senior surgeon's conviction for manslaughter is quashed. *BMJ* 2016;355:i6178. doi:10.1136/bmj.i6178 pmid:27852571.
- 6 Sellu v The Crown. 15 Nov 2016. [www.bailii.org/ew/cases/EWCA/Crim/2016/1716.html](http://www.bailii.org/ew/cases/EWCA/Crim/2016/1716.html).
- 7 National Advisory Group on the Safety of Patients in England. A promise to learn—a commitment to act. Department of Health, 2013.
- 8 Donaldson LJ, Panesar SS, Darzi A. Patient-safety-related hospital deaths in England: thematic analysis of incidents reported to a national database, 2010-2012. *PLoS Med* 2014;11:e1001667. doi:10.1371/journal.pmed.1001667 pmid:24959751.

### 评论

## 我国医疗过失的刑罚原则:预防作用为主,医生仍需关注

关健

中国医学科学院北京协和医院教授 律师

上述短文讨论有关医疗过失导致患者严重伤害或死亡的刑罚机制,是医疗服务领域一个长期话题<sup>1</sup>。英国、澳大利亚等国家的刑法把医疗诊治过程中过失导致患者死亡的行为适用过失杀人罪<sup>2,3</sup>。我国法律就医疗过失的刑罚规定与上述国家不同。我国《刑法》第二百三十三条规定,“过失致人死亡的,处3年以上7年以下有期徒刑;情节较

轻的,处3年以下有期徒刑。”同时,《刑法》第三百三十五条规定“医务人员由于严重不负责任,造成就诊人死亡或者严重损害就诊人身体健康的,处3年以下有期徒刑或者拘役。”即针对特殊犯罪主体——医务人员,我国刑法设置了医疗事故罪,而不适用过失致人伤害或死亡罪,且相应地刑罚设置较轻。

我国单独列出医疗事故罪,考虑了临床医疗活动本身有特殊的导致人身伤亡的高度危险性,如果把一般过失行为确定为犯罪,在法律和伦理上均有失公平,不利于医学事业的发展。我国的医疗事故罪实质要求是责任事故,即医疗责任事故是构成犯罪的前提,医疗技术事故不构成犯罪。

我们从犯罪构成分析进一步说明:医疗事故罪的主体为特殊主体,是达到刑事责任年龄并具有刑事责任能力的实施了违章医疗行为的医务人员。主观要件方面,要求在主观方面存在严重过失。本罪侵犯的客体是医疗单位的工作秩序,以及公民的生命健康权利。客观要件具体包括三个方面:(1)本罪在客观方面表现为严重不负责任,造成就诊人死亡或者严重损害就诊人身体健康的行为。医疗事故案件中常见的严重不负责任,违反规章制度的情况,例如错用药物、药物给药路径或剂量严重错误、擅离职守、交接班草率等。(2)因严重不负责任行为导致患者严重损害身体健康或死亡的结果。(3)严重不负责任行为与病员重伤、死亡之间必须存在刑法上的因果关系。

医疗行业的高风险在于服务对象是人类自身,而人类器官不可再生。医务人员依照法律承担救死扶伤的职责,有义务对自己的医疗业务行为负责,即对患者的生命健康安全负责,据此,高度注意是医务人员诊疗过程中的一个重要义务。但正如上述短文中所谈及,因为各种客观因素,包括系统、设备、管理以及医务人员自身原因,即使医务人员没有主观恶性,仍然难以避免地因过失导致患者的身体损害,甚至死亡。但医务人员同时也是普通人,会疲倦……,而且不同级别医疗机构的业务水平和技术设施等均存在不同;不同医务人员的业务能力和技术水平有所不同。完全无视医疗服务的技术高风险因素,就会对医务人员造成更大的困惑和压力,不利于医疗救治服务的开展。

我国刑法制定中考虑了对医务人员权益的保障,更有利于刑法体系法律的预防价值和作用。经查询发现,目前我国要求赔偿或补偿的案例,甚至涉医暴力也时有发生,但在我国只有极少数的医生被控医疗事故罪。所以我国医务人员,虽然目前执业环境有待改善,但与国际同行来比,执业政策和

环境各有优势。希望在医患关系信心不足的情况下,刑法的规定对我国的医务人员是一个安慰和鼓励。

事实上,整体上英国被指控过失杀人罪的医生总数也并不多。有文献综述显示,从文献资料搜索到英国1795—2005年共有85名医生被控过失杀人罪;从1990年开始,被控人数显著增加。大多数医生由于错误(37)或不认真(17),少数因涉嫌违规(16)而被指控。多数医生,包括该综述中的60位医生被判无罪,22人被判罪,3人认罪<sup>46</sup>。但从2015年开始,英国这种指控增加趋势更加明显<sup>7</sup>。近年来,我国医生因医疗事故罪被刑事指控也有所发生<sup>8,9</sup>。

法律,特别是刑法的最终目的不在惩罚,而是预防。希望通过上述相关法律规定的简单论述,使大家更深刻地理解医疗服务的高风险特征。通过各方共同努力让更多的大众理解这种高风险,并与医生共同承担高风险,让我们的医生得以全身心于救死扶伤。同时也提醒医务人员应该具有更高的工作责任感,努力提高业务水平,更审慎地依法执业,为病患也为自己。

#### 参考文献

- 1 Brahams D. Doctors and manslaughter. *Lancet* 1993; 341(8857): 1404.
- 2 Siegel-Itzkovich J. Israeli surgeon accused of killing two patients. *BMJ* 2000; 320(7245): 1292.
- 3 Carter DJ. Correcting the record: Australian prosecutions for manslaughter in the medical context. *J Law Med* 2015 Mar;22(3): 588-609.
- 4 Ferner RE, McDowell SE. Doctors charged with manslaughter in the course of medical practice, 1795-2005: a literature review. *J R Soc Med* 2006; 99(6): 309-314.
- 5 Dyer C. Surgeons cleared of manslaughter after removing wrong kidney. *BMJ* 2002; 325(7354): 9.
- 6 Dyer C. Junior doctor is cleared of manslaughter after feeding tube error. *BMJ* 2003; 326(7386): 414.
- 7 White P. More doctors charged with manslaughter are being convicted, shows analysis. *BMJ* 2015; 351: h4402. doi:10.1136/bmj.h4402.
- 8 汪红,洪雪.北京首例医生被控医疗事故罪案开庭,庭审仍进行.法制晚报,2014,14:16.
- 9 杨×医疗事故罪二审刑事判决书. <http://www.bjcourt.gov.cn/cpws/paperView.htm?id=100190801266>.

(收稿日期:2017-08-26)

BMJ takes no responsibility for the accuracy of the translation from the published English language original and is not liable for any errors that may occur.

# BMJ
